# Supplementary material
Source: ML conference proceedings conference paper supplement (https://openaccess.thecvf.com/content/CVPR_2020/html/Li_Learning_to_Learn_CVPR_2020_paper.html)
Supplement: Supplementary file 1 [file Li_Learning_to_Learn_CVPR_2020_supplemental.pdf]

# Learning to Learn Cropping Models for Different Aspect Ratio Requirements Supplementary Material

Debang Li<sup>1,2</sup>, Junge Zhang<sup>1,2</sup>, Kaiqi Huang<sup>1,2,3</sup>

<sup>1</sup> CRISE, Institute of Automation, Chinese Academy of Sciences, Beijing, China

<sup>2</sup> School of Artificial Intelligence, University of Chinese Academy of Sciences, Beijing, China

<sup>3</sup> CAS Center for Excellence in Brain Science and Intelligence Technology, Beijing, China

{debang.li, jgzhang, kaiqi.huang}@nlpr.ia.ac.cn

## 1. More Qualitative Results of the Proposed Method

During the inference, the model predicts the cropping area (intermediate result) according to the required aspect ratio at first and then obtains the final cropping result using a post-processing process. In this section, we show more intermediate and final cropping results in Figure 1 and Figure 2. These results show that the predicted area of the model for an image varies with the required aspect ratio, demonstrating that the proposed model can handle different aspect ratios adaptively. After the post-processing process, the obtained cropping results can effectively represent the original images while satisfying the aspect ratio requirements.

## 2. More Qualitative Comparison Results against State-of-the-art Methods

In this section, we present more qualitative comparison results against state-of-the-art methods. Following the main paper, we compare the proposed method with the VFN [2], A2RL [5], VPN [6], VEN [6], and GAIC [7] models. For a better comparison, we show more qualitative results of different methods on the HCDB [4], FCDB [1], and FAT [3] datasets using the same settings as the main paper. The results are presented in Figure 3, Figure 4, Figure 5, Figure 6, Figure 7, Figure 8, and Figure 9.

## References

- [1] Yi-Ling Chen, Tzu-Wei Huang, Kai-Han Chang, Yu-Chen Tsai, Hwann-Tzong Chen, and Bing-Yu Chen. Quantitative analysis of automatic image cropping algorithms: A dataset and comparative study. In *WACV*, 2017.
- [2] Yi-Ling Chen, Jan Klopp, Min Sun, Shao-Yi Chien, and Kwan-Liu Ma. Learning to compose with professional photographs on the web. In *ACM MM*, 2017.
- [3] Seyed A Esmacili, Bharat Singh, and Larry S Davis. Fast-at: Fast automatic thumbnail generation using deep neural networks. In *CVPR*, 2017.
- [4] Chen Fang, Zhe Lin, Radomir Mech, and Xiaohui Shen. Automatic image cropping using visual composition, boundary simplicity and content preservation models. In *ACM MM*, 2014.
- [5] Debang Li, Huikai Wu, Junge Zhang, and Kaiqi Huang. A2-rl: Aesthetics aware reinforcement learning for image cropping. In *CVPR*, 2018.
- [6] Zijun Wei, Jianming Zhang, Xiaohui Shen, Zhe Lin, Radomír Mech, Minh Hoai, and Dimitris Samaras. Good view hunting: learning photo composition from dense view pairs. In *CVPR*, 2018.
- [7] Hui Zeng, Lida Li, Zisheng Cao, and Lei Zhang. Reliable and efficient image cropping: A grid anchor based approach. In *CVPR*, 2019.

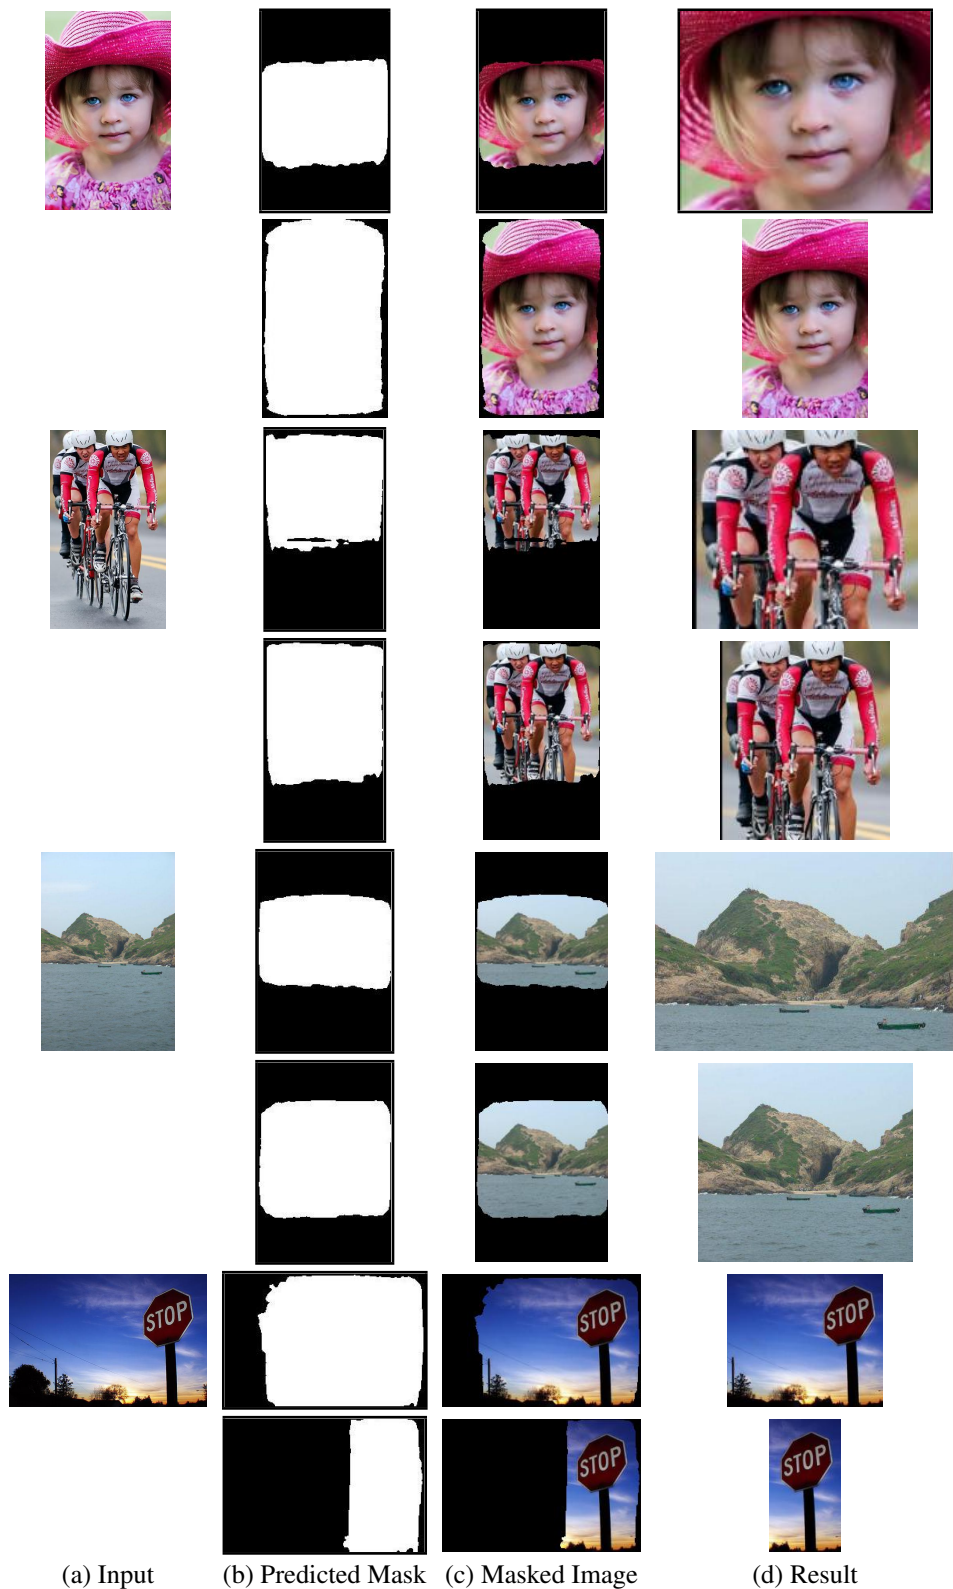

Figure 1. **Qualitative results of the proposed method.** In each group of images, the left one is the input image, the second column shows the predicted maps ( $H_{out} \times W_{out} \times 1$ ) for different aspect ratio requirements, the third column shows the images masked by the predicted maps, and the fourth column shows the results satisfying the aspect ratio requirements after the post-processing.

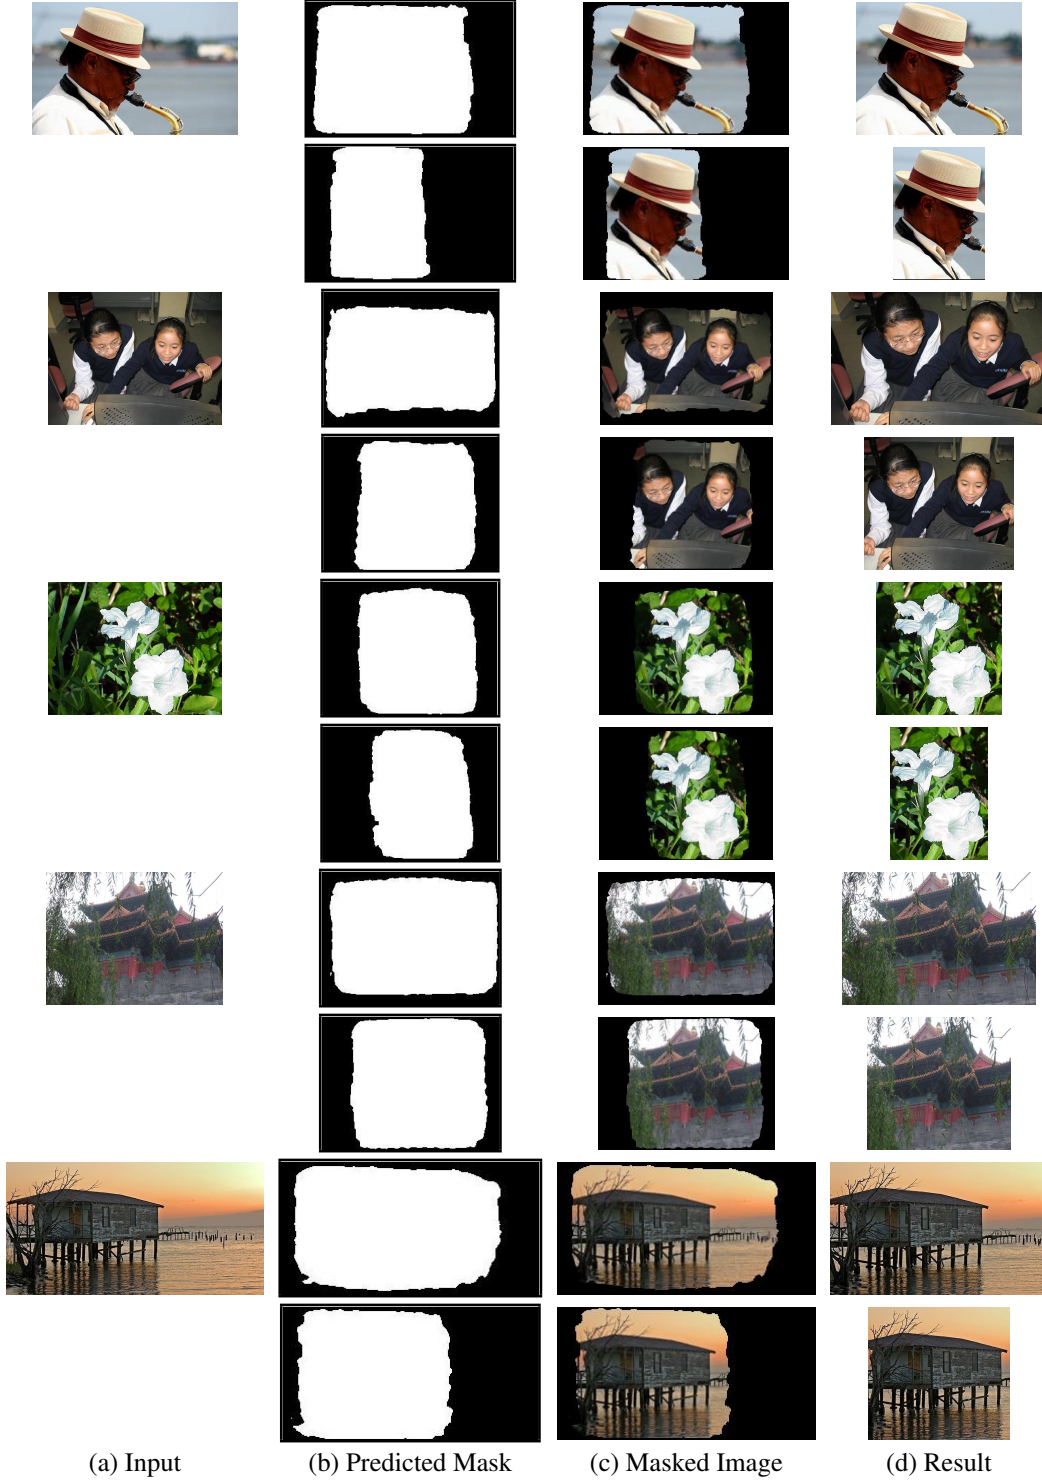

Figure 2. **Qualitative results of the proposed method.** In each group of images, the left one is the input image, the second column shows the predicted maps ( $H_{out} \times W_{out} \times 1$ ) for different aspect ratio requirements, the third column shows the images masked by the predicted maps, and the fourth column shows the results satisfying the aspect ratio requirements after the post-processing.

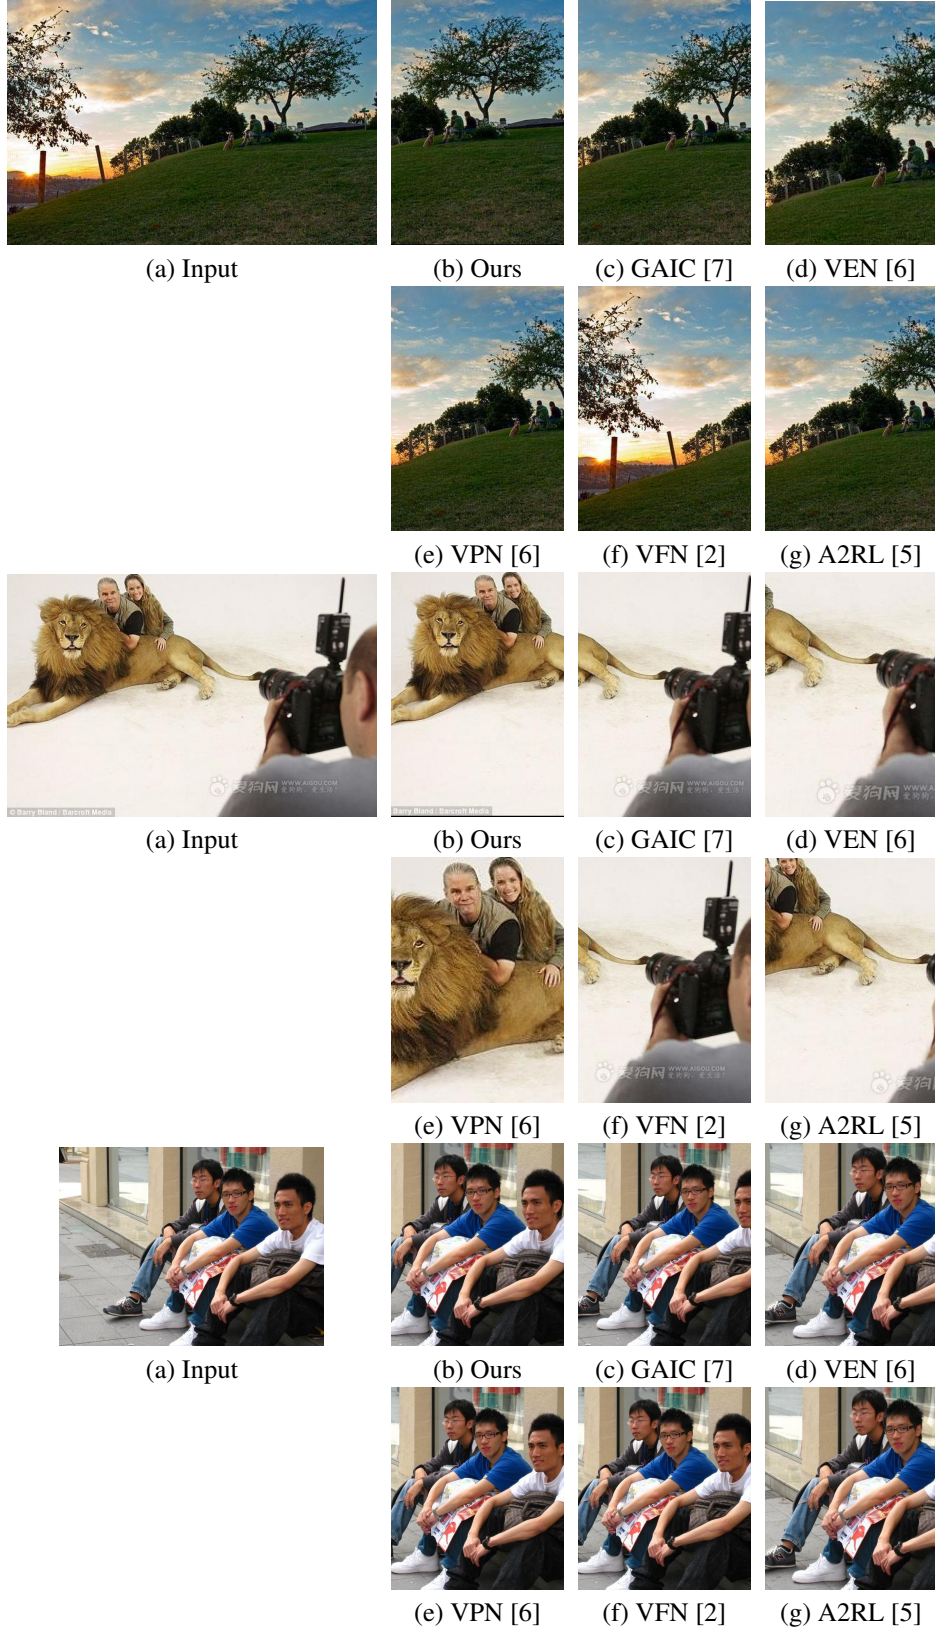

Figure 3. **Qualitative comparison results against state-of-the-art methods on the FAT [3] dataset.** Following the settings of the main paper, we generate the cropping results of the specified aspect ratio using different methods for the qualitative comparison.



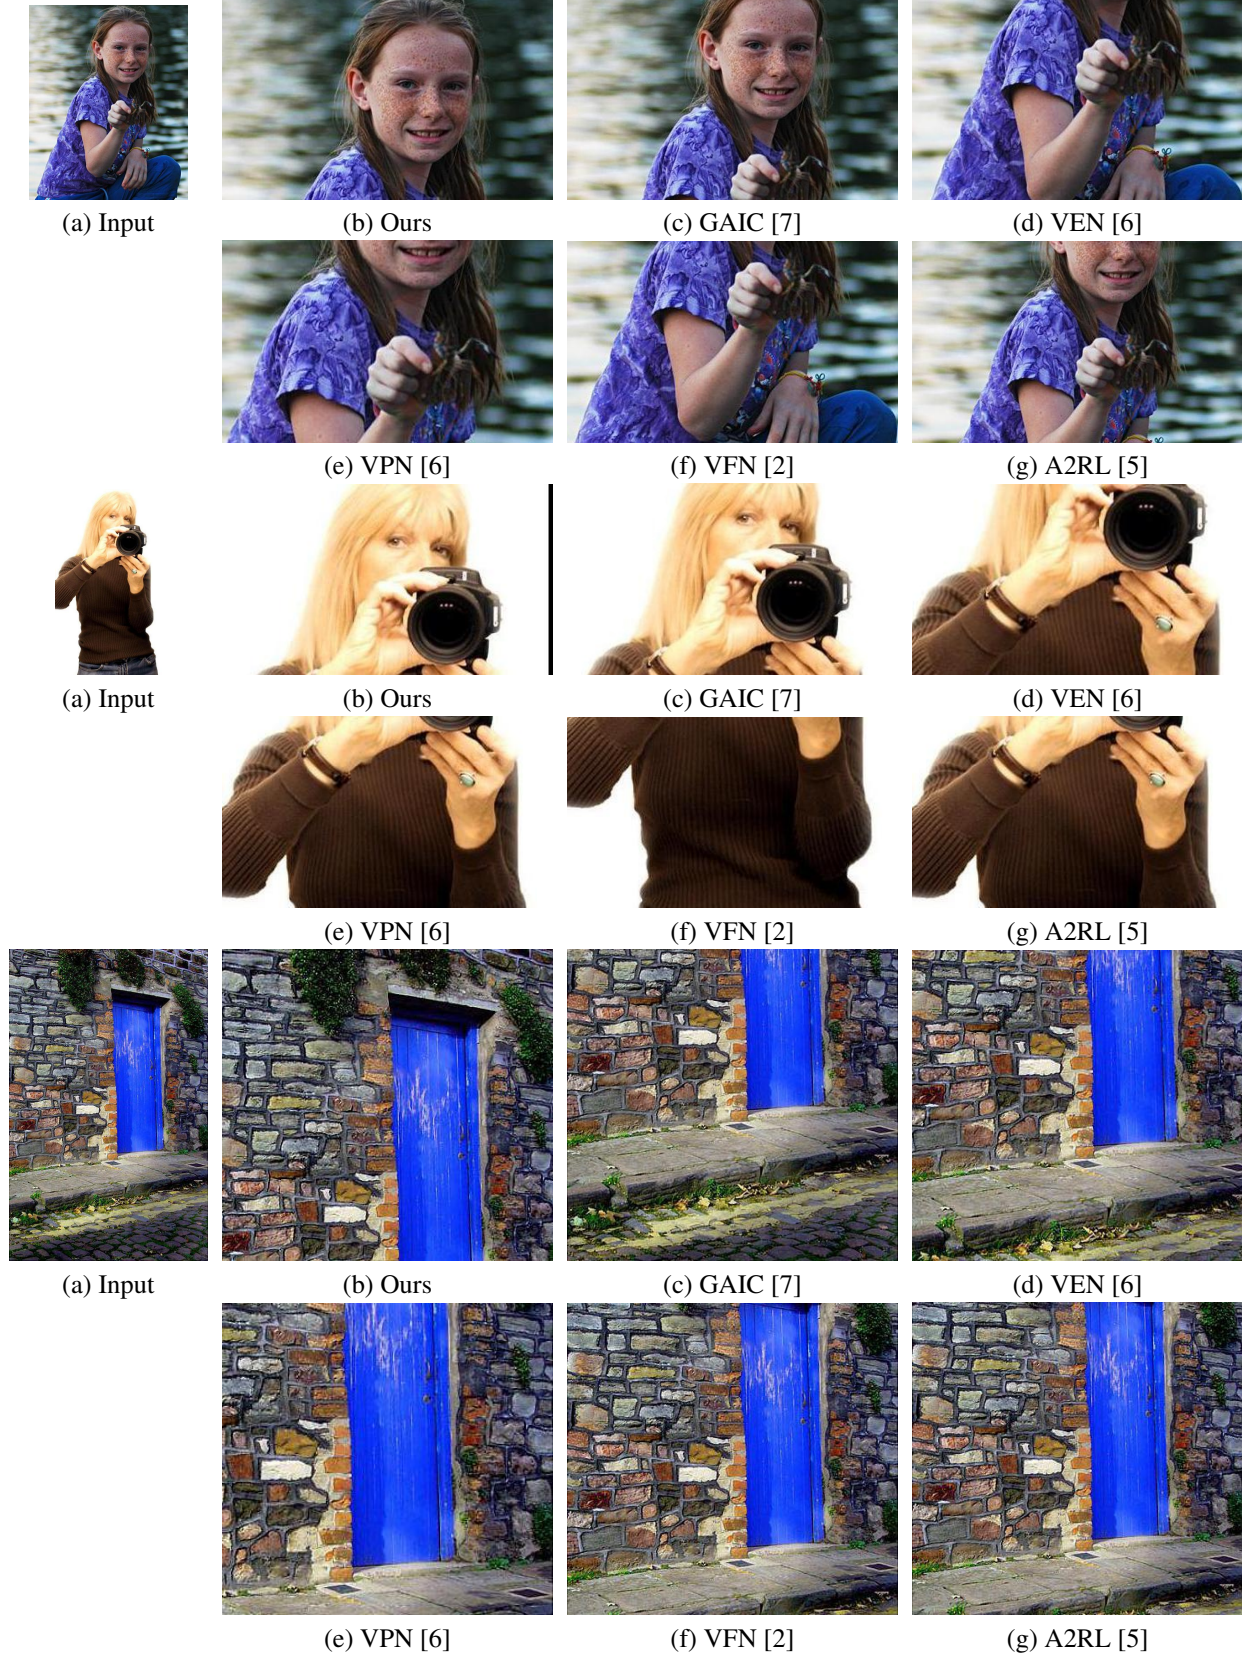

Figure 4. **Qualitative comparison results against state-of-the-art methods on the FAT [3] dataset.** Following the settings of the main paper, we generate the cropping results of the specified aspect ratio using different methods for the qualitative comparison.



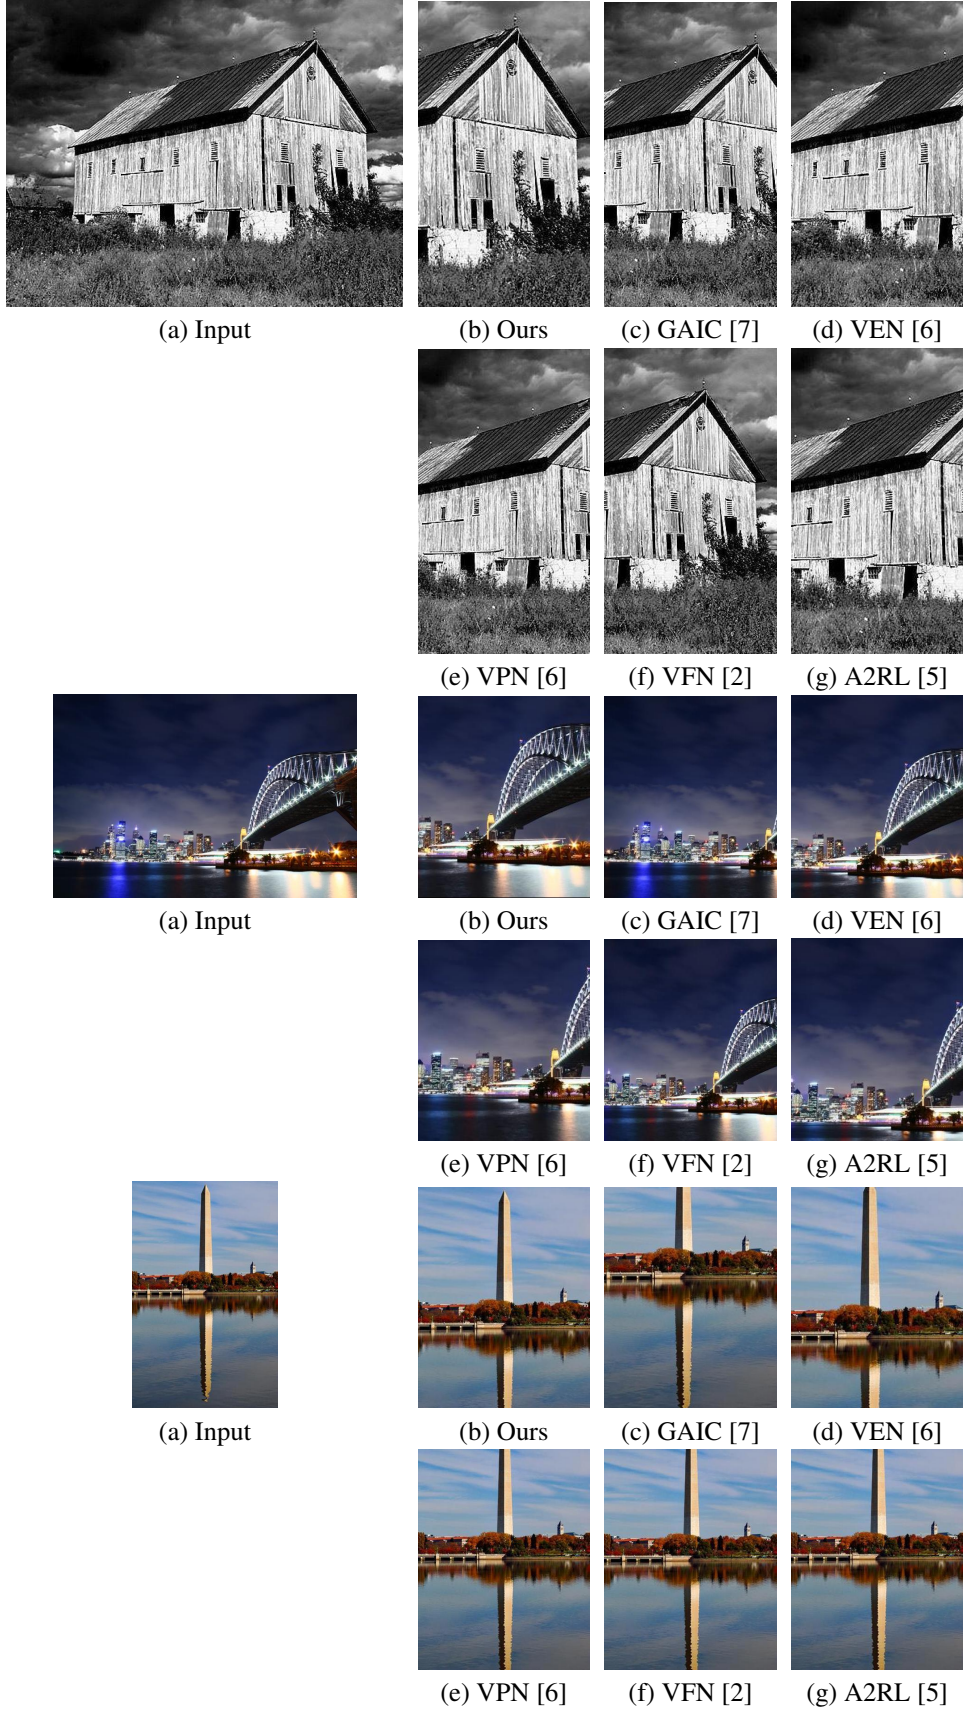

Figure 5. **Qualitative comparison results against state-of-the-art methods on the FAT [3] dataset.** Following the settings of the main paper, we generate the cropping results of the specified aspect ratio using different methods for the qualitative comparison.

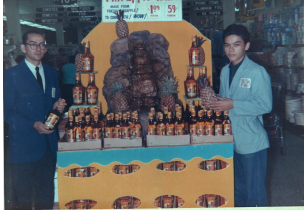

(a) Input

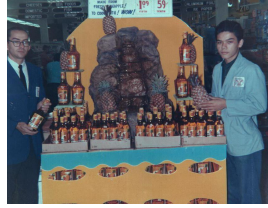

(b) Ours

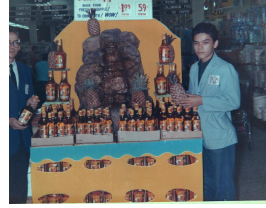

(c) GAIC [7]

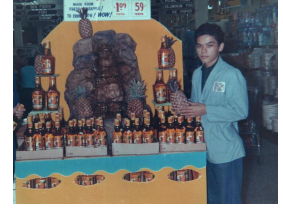

(d) VEN [6]

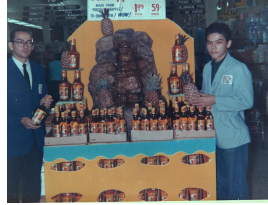

(e) VPN [6]

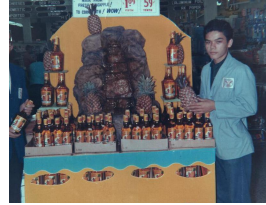

(f) VFN [2]

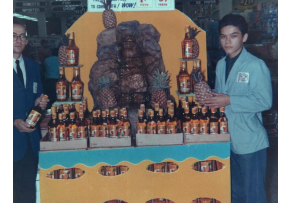

(g) A2RL [5]

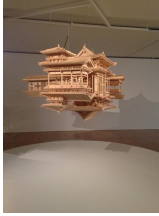

(a) Input

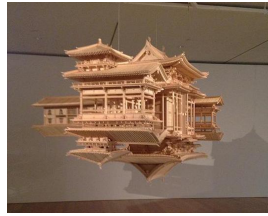

(b) Ours

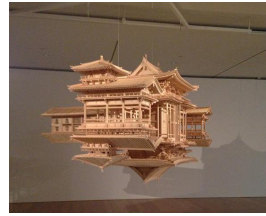

(c) GAIC [7]

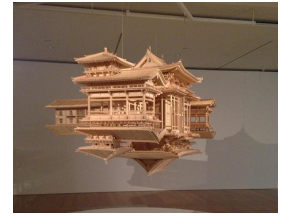

(d) VEN [6]

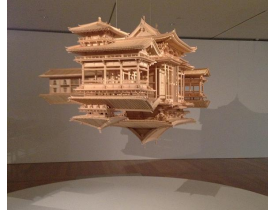

(e) VPN [6]

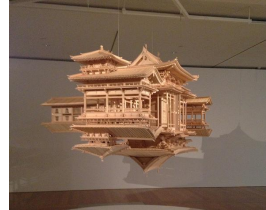

(f) VFN [2]

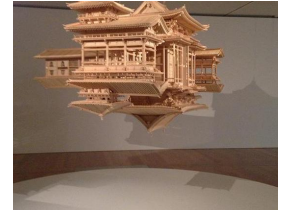

(g) A2RL [5]

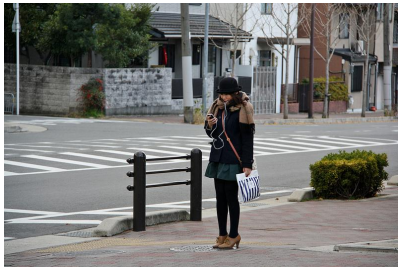

(a) Input

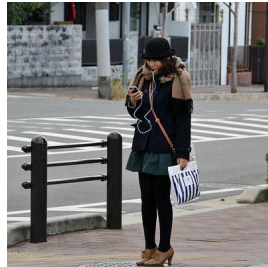

(b) Ours

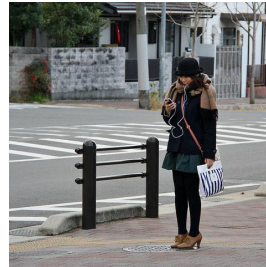

(c) GAIC [7]

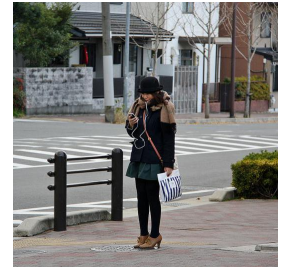

(d) VEN [6]

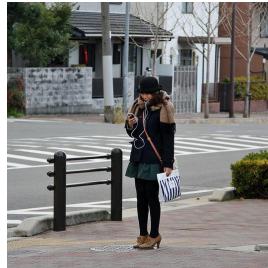

(e) VPN [6]

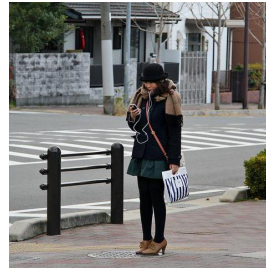

(f) VFN [2]

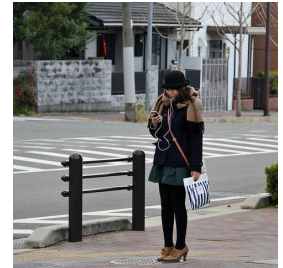

(g) A2RL [5]

Figure 6. **Qualitative comparison results against state-of-the-art methods on the FCDB [1] dataset.** Following the settings of the main paper, we generate the cropping results of the specified aspect ratio using different methods for the qualitative comparison.



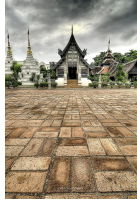

(a) Input

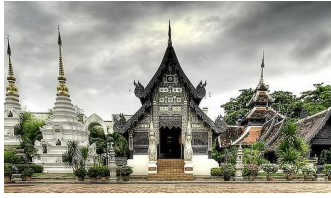

(b) Ours

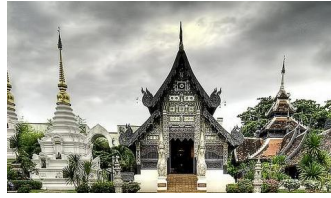

(c) GAIC [7]

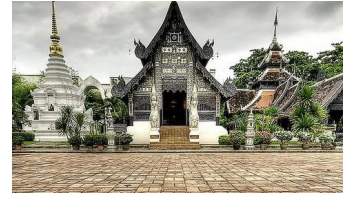

(d) VEN [6]

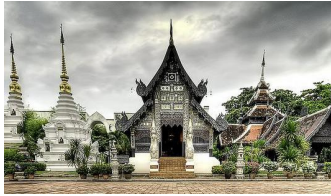

(e) VPN [6]

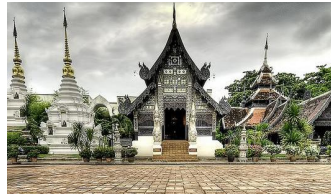

(f) VFN [2]

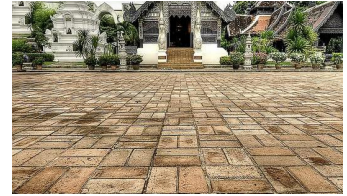

(g) A2RL [5]

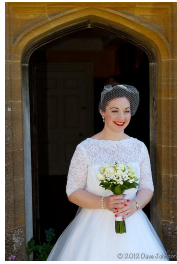

(a) Input

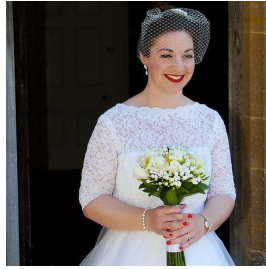

(b) Ours

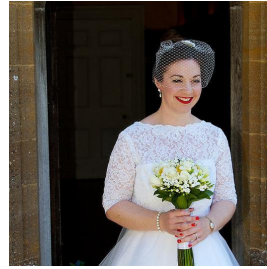

(c) GAIC [7]

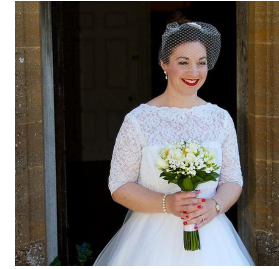

(d) VEN [6]

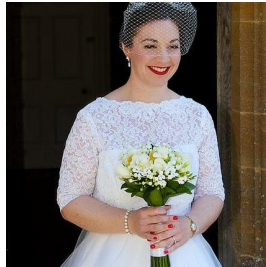

(e) VPN [6]

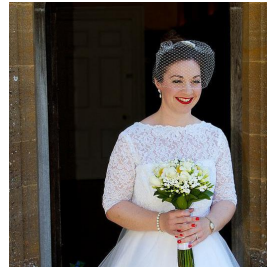

(f) VFN [2]

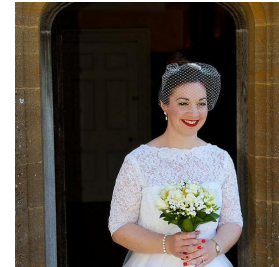

(g) A2RL [5]

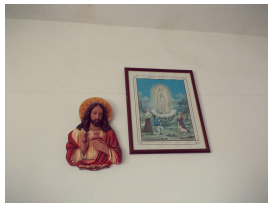

(a) Input

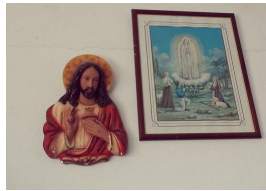

(b) Ours

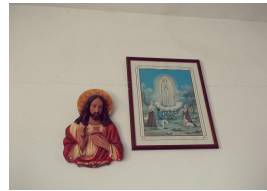

(c) GAIC [7]

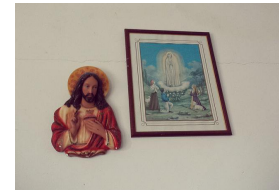

(d) VEN [6]

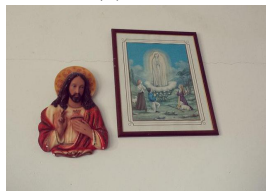

(e) VPN [6]

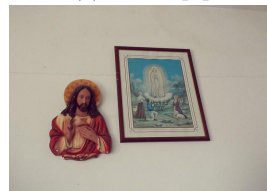

(f) VFN [2]

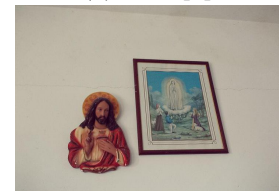

(g) A2RL [5]

Figure 7. **Qualitative comparison results against state-of-the-art methods on the FCDB [1] dataset.** Following the settings of the main paper, we generate the cropping results of the specified aspect ratio using different methods for the qualitative comparison.



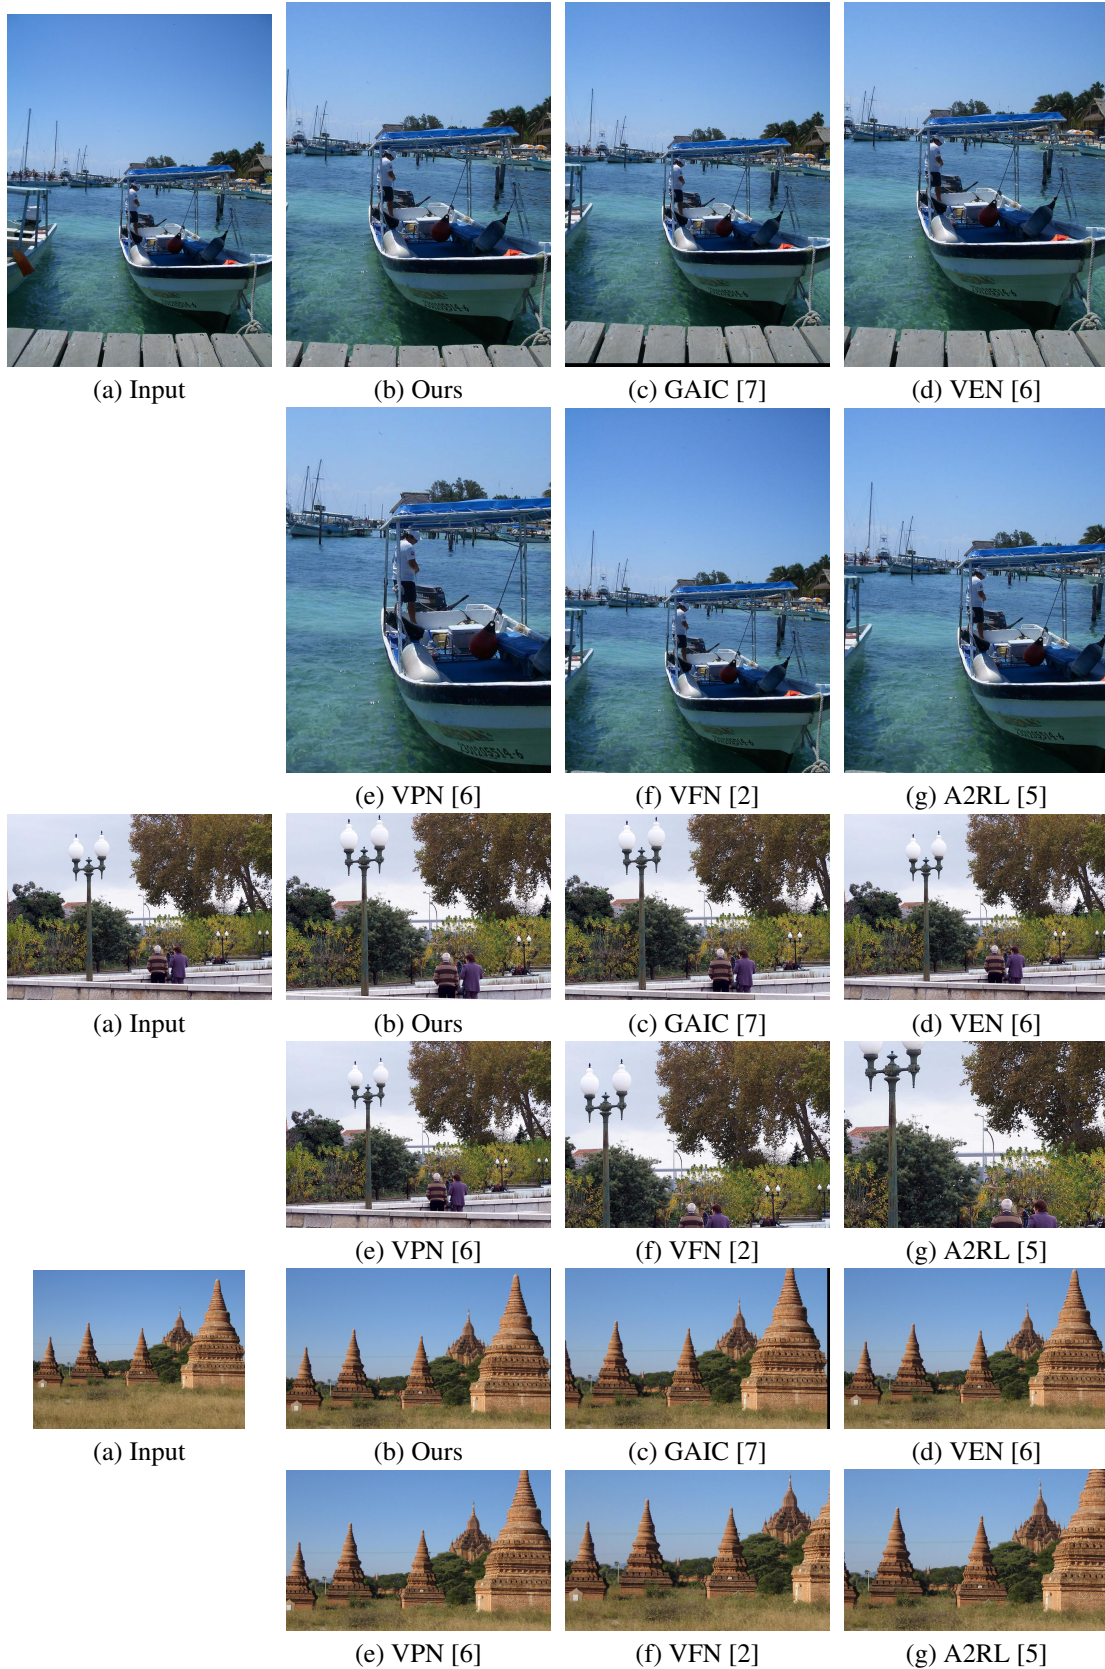

Figure 8. **Qualitative comparison results against state-of-the-art methods on the HCDB [4] dataset.** Following the settings of the main paper, we generate the cropping results of the specified aspect ratio using different methods for the qualitative comparison.



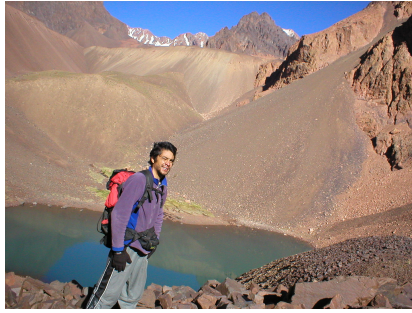

(a) Input

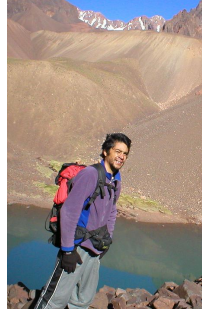

(b) Ours

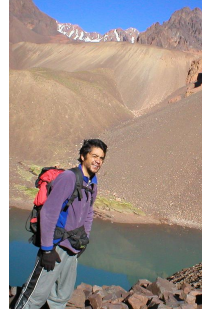

(c) GAIC [7]

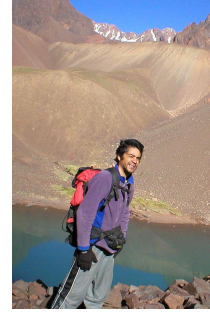

(d) VEN [6]

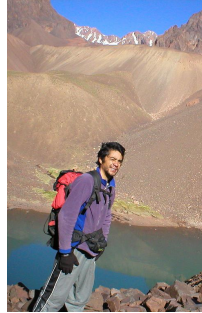

(e) VPN [6]

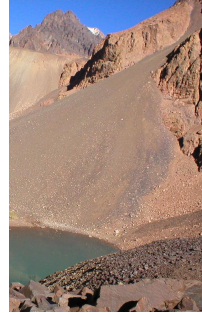

(f) VFN [2]

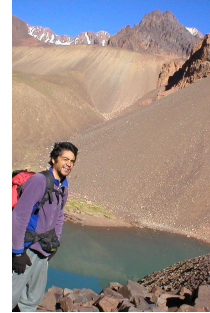

(g) A2RL [5]

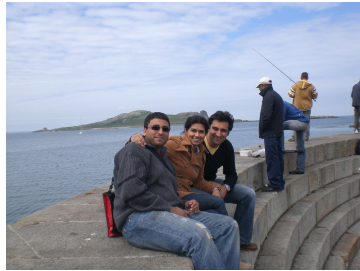

(a) Input

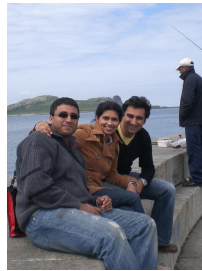

(b) Ours

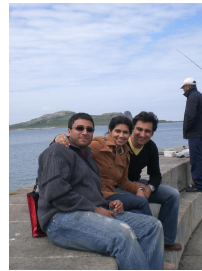

(c) GAIC [7]

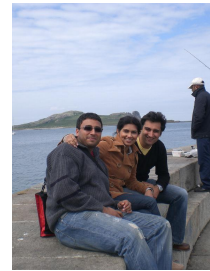

(d) VEN [6]

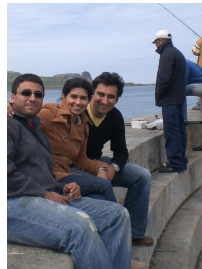

(e) VPN [6]

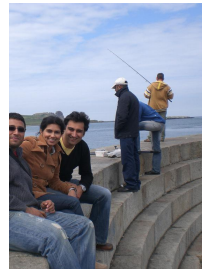

(f) VFN [2]

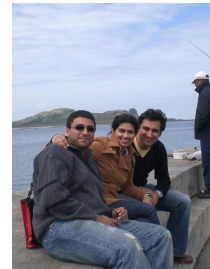

(g) A2RL [5]

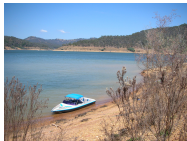

(a) Input

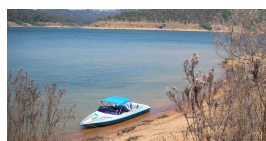

(b) Ours

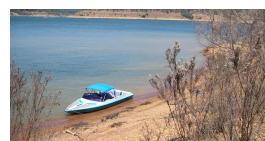

(c) GAIC [7]

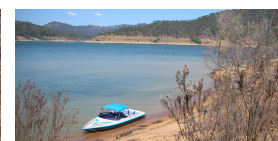

(d) VEN [6]

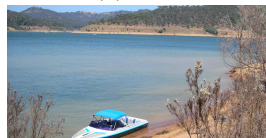

(e) VPN [6]

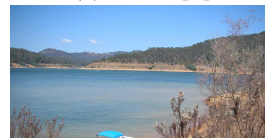

(f) VFN [2]

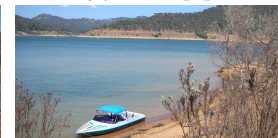

(g) A2RL [5]

Figure 9. **Qualitative comparison results against state-of-the-art methods on the HCDB [4] dataset.** Following the settings of the main paper, we generate the cropping results of the specified aspect ratio using different methods for the qualitative comparison.
